# Supplementary material for: Synthesis of a visible-light active V2O5–g-C3N4 heterojunction as an efficient photocatalytic and photoelectrochemical material
Source: Royal Society of Chemistry journal article supplement (doi:10.1039/c4nj01807a), 2014-12-03
Supplement: c4nj01807a1.pdf [file c4nj01807a1.pdf]

Electronic Supplementary Material (ESI)

## Synthesis of visible-light active $V_2O_5/g-C_3N_4$ heterojunction as an efficient photocatalytic and photoelectrochemical performance

Theerthagiri Jayaraman <sup>a</sup>, Senthil Arumugam Raja <sup>a</sup>, Annamalai Priya <sup>a</sup>, Madhavan Jagannathan <sup>a,\*</sup>, Muthupandian Ashokkumar <sup>b</sup>

<sup>a</sup> Solar Energy Lab, Department of Chemistry, Thiruvalluvar University, Vellore-632 115, India.

<sup>b</sup> School of Chemistry, University of Melbourne, Parkville campus, Melbourne, VIC 3010, Australia.

\* To whom all correspondences should be addressed E-mail: [jagan.madhavan@gmail.com](mailto:jagan.madhavan@gmail.com)  
(J. Madhavan)

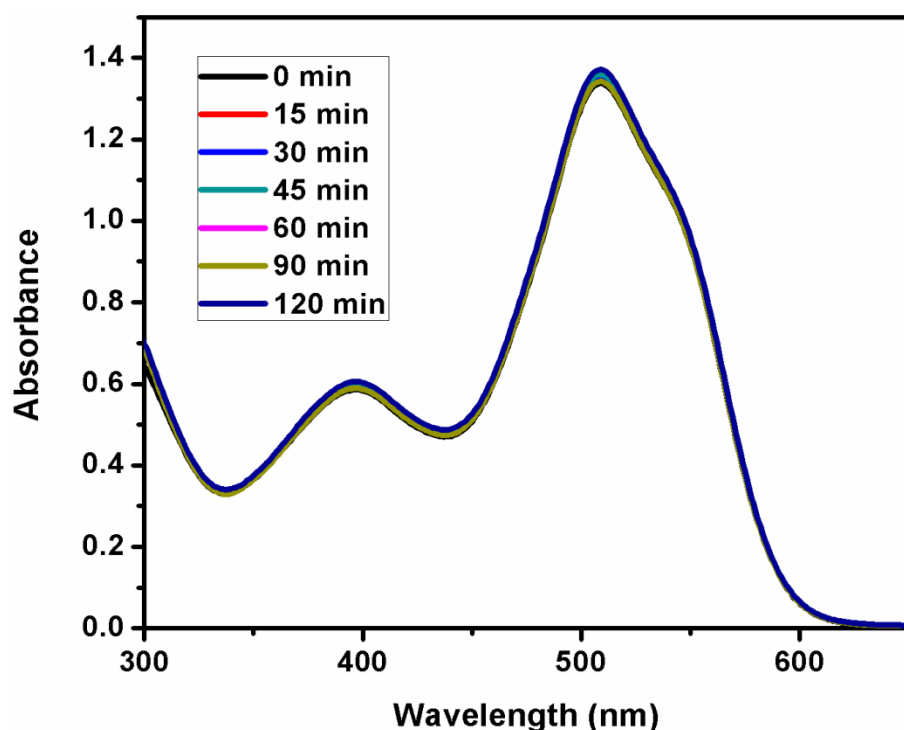

**Fig. S1** A control test in the absence of catalyst for the dye alone ( $5 \times 10^{-5}$  M) for about 2 hours of visible light irradiation.
